# Supplementary material for: A Freestanding Multifunctional Interlayer Based on Fe/Zn Single Atoms Implanted on a Carbon Nanofiber Membrane for High-Performance Li-S Batteries
Source: MDPI journal article supplement (doi:10.3390/batteries10010015), 2023-12-31
Supplement: s1 [file s1]

# A Freestanding Multifunctional Interlayer Based on Fe/Zn Single Atoms Implanted Carbon Nanofiber Membrane for High-Performance Li-S Batteries

Mengdi Zhang\*, Shuoshuo Kong, Bei Chen, and Mingbo Wu\*

State Key Laboratory of Heavy Oil Processing, Advanced Chemical Engineering and Energy Materials Research Center, College of New Energy, China University of Petroleum (East China), Qingdao 266580, China

\* Correspondence: mdzhang@upc.edu.cn; wumb@upc.edu.cn

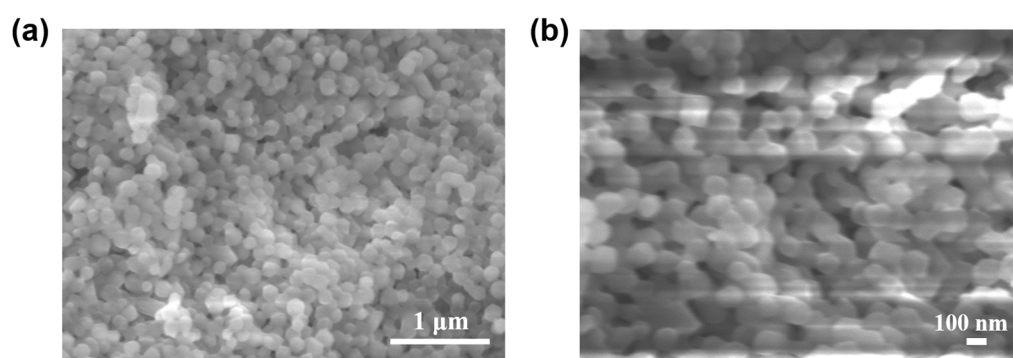

Figure S1. (a,b) SEM images of FeZn-ZIF.

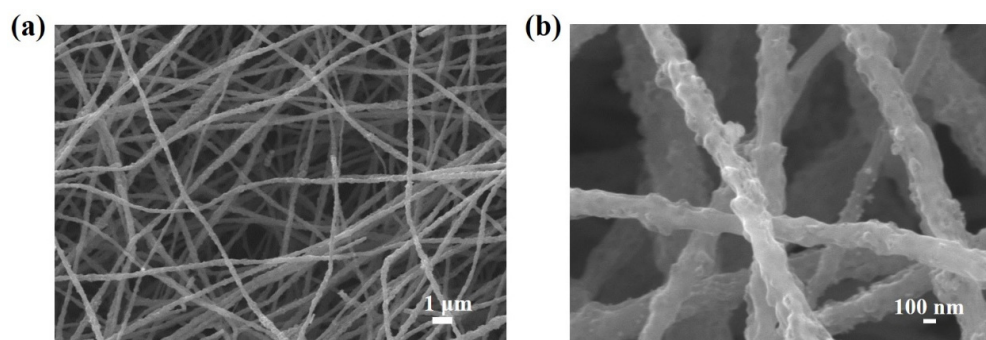

Figure S2. (a,b) SEM images of PAN/PVP/FeZn-ZIF nanofiber membrane.

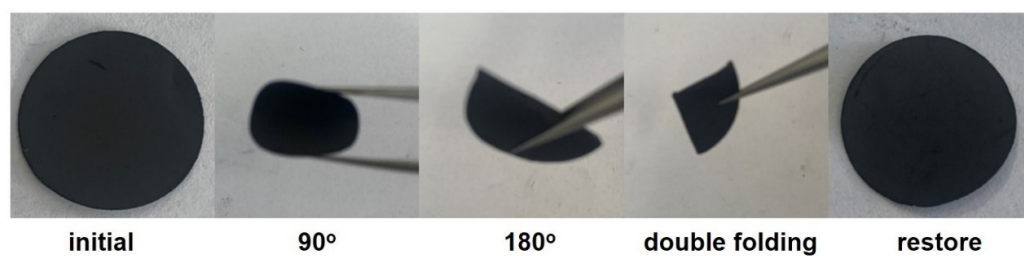

Figure S3. Optical photographs of FeZn-PCNF membrane at different fold angles.

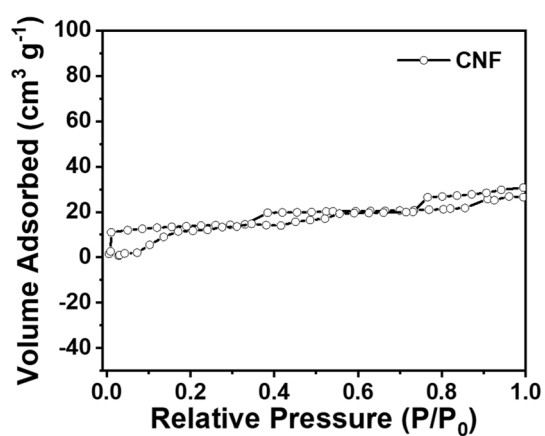

Figure S4. N<sub>2</sub> adsorption-desorption isotherms of CNF.

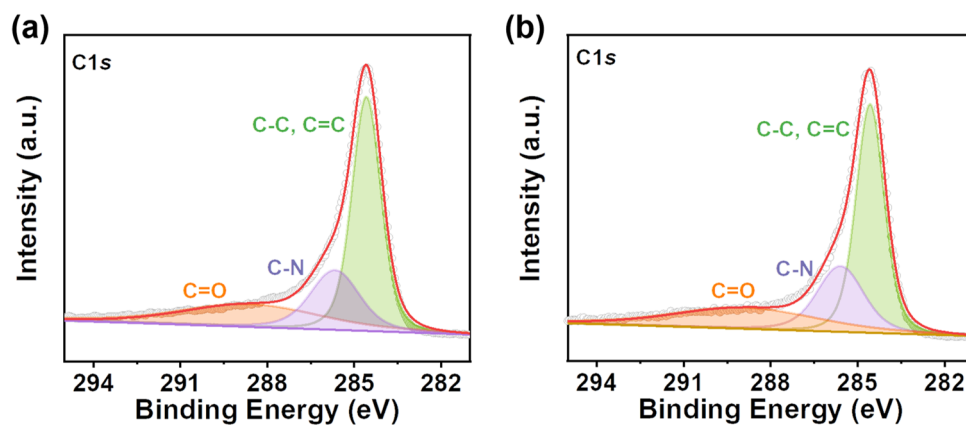

Figure S5. High-resolution XPS spectra of C 1s in (a) FeZn-PCNF and (b) PCNF.

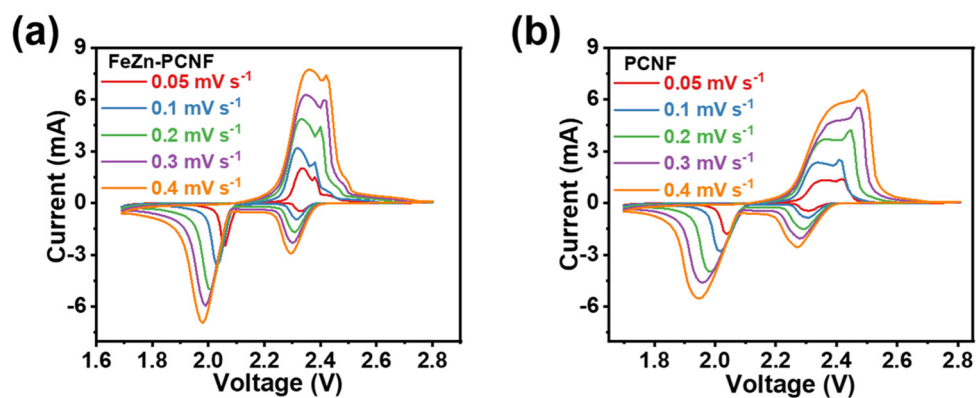

**Figure S6.** CV curves of the Li-S batteries with (a) FeZn-PCNF and (b) PCNF interlayers at different scan rates from 0.05 to 0.4  $\text{mV s}^{-1}$ .

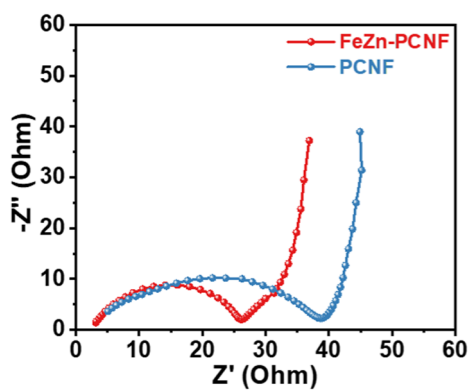

**Figure S7.** EIS spectra of the Li-S batteries with FeZn-PCNF and PCNF interlayers.

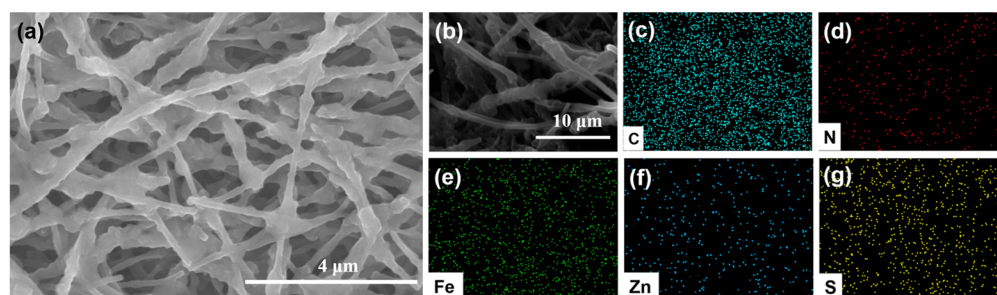

**Figure S8.** (a and b) SEM images of FeZn-PCNF interlayer and EDS elemental mappings of (c) C, (d) N, (e) Fe, (f) Zn and (g) S after cycles.

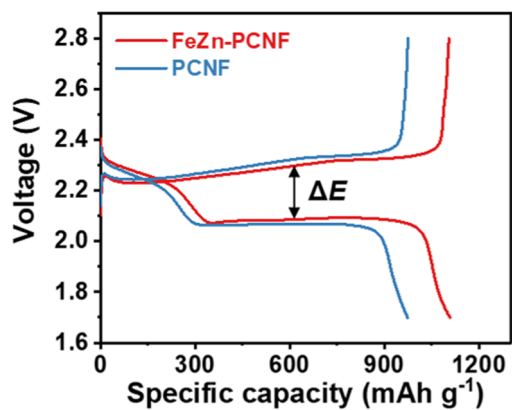

**Figure S9.** GCD curves of the Li-S batteries with FeZn-PCNF and PCNF interlayers.

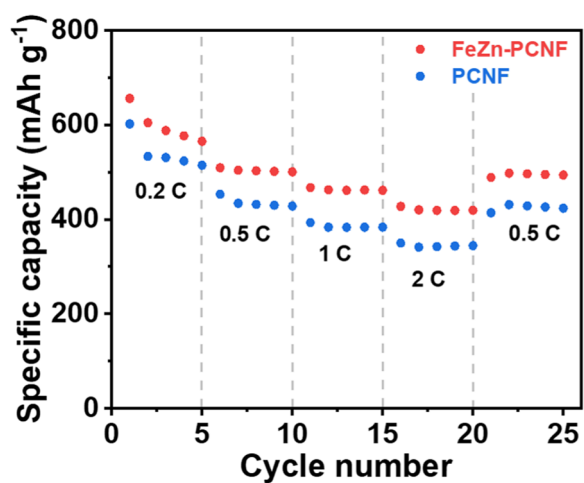

**Figure S10.** Discharge capacities of the Li-S batteries with FeZn-PCNF and PCNF interlayers based on the total mass of cathode and interlayer.

**Table S1.** Proportion of various N species in FeZn-CNF and PCNF.

| Sample    | Pyridinic N | Pyrrolic N | Graphitic N | Oxidized N |
|-----------|-------------|------------|-------------|------------|
| FeZn-PCNF | 40.06%      | 20.31%     | 17.41%      | 22.22%     |
| PCNF      | 32.61%      | 36.59%     | 18.40%      | 12.40%     |
